# Supplementary material for: Ensuring center quality, proper patient selection and fair access to chimeric antigen receptor T-cell therapy: position statement of the Austrian CAR-T Cell Network
Source: Springer Nature journal article supplement (doi:10.1007/s12254-020-00582-4), 2020-02-20
Supplement: MOESM1 [file 17730190]

**Appendix 1**

**Qualitätsgesicherte Durchführung der CAR-T-Zelltherapie in Österreich**

Eine Empfehlung der CAR-T-Zellplattform der Österreichischen Gesellschaft für Hämatologie und Medizinische Onkologie (ÖGHO)

Chimäre Antigen-Rezeptor-T-Zellen (CAR-T-Zellen) stellen eine neue Form der zellulären Immuntherapie für Krebspatienten dar. Dazu werden Immunzellen des Patienten mittels Leukapherese gewonnen, im Labor mit dem Gen eines tumorspezifischen Rezeptors mithilfe eines retroviralen oder lentiviralen Vektors transduziert, expandiert und dem Patienten nach entsprechenden Qualitätskontrollen und nach Verabreichung einer lymphodepletierenden Therapie retransfundiert (1). Diese genmodifizierten T-Lymphozyten erkennen selektiv Antigene an der Oberfläche von Tumorzellen, gegen die sie gerichtet sind und eliminieren maligne Erkrankung nach T-Zellaktivierung (1).

Bisher wurden zwei kommerzielle CAR-T-Zellprodukte von der European Medicines Agency (EMA) zugelassen, die chimäre Antigen-Rezeptoren gegen CD19, ein Oberflächenmolekül von B-Lymphozyten, enthalten: Tisagenlecleucel (Kymriah®) für die Therapie von Kindern und Erwachsenen bis 25 Jahre mit akuter lymphatischer Leukämie (ALL) der B-Zellreihe und für Patienten mit diffus großzelligem B-Zell-Lymphom (DLBCL) sowie Axicabtagen Ciloleucel (Yescarta®) für Patienten mit DLBCL und mit primär mediastinalem großzelligem B-Zell-Lymphom (PMBCL), jeweils beschränkt auf Patienten mit rezidivierter oder refraktärer Erkrankung nach Standardtherapien (2,3).

An Nebenwirkungen dieser beiden bisher zugelassenen Zellprodukte sind das Cytokine Release Syndrom (CRS), das CAR-T-Cell-Related Encephalopathy Syndrome (CRES), Zytopenien, Infekte und langdauernde B-Zell-Aplasien zu nennen. Auftreten und Schweregrad dieser Nebenwirkungen sind individuell unterschiedlich und auch Präparate-spezifisch. Fulminante Krankheitsbilder bis zum Multiorganversagen und schwerem Hirnödem wurden in klinischen Studien berichtet, weshalb es für die sichere Durchführung der CAR-T-Zelltherapie unbedingt erforderlich ist, die zu behandelnden Patienten sorgfältig auszuwählen und diese in qualifizierten CAR-T-Zellzentren zu therapieren.

Die im folgenden dargestellten Indikationskriterien und Strukturkriterien wurden innerhalb der CAR-T-Zellplattform der Österreichischen Gesellschaft für Hämatologie und Medizinische Onkologie (ÖGHO) erarbeitet. In dieser Stellungnahme werden die Voraussetzungen für eine qualitätsgesicherte Durchführung der CAR-T-Zelltherapie in Österreich beschrieben. Eine jährliche bzw. anlassbezogene Überprüfung und Aktualisierung dieser Kriterien ist vorgesehen.

An der durchführenden Institution müssen fachspezifische Kompetenzen in der Therapie von Patienten mit der jeweiligen malignen Grunderkrankung, zelltherapeutische Kompetenzen im Umgang mit genmodifizierten Zellen und intensivmedizinische Kompetenzen in der Therapie schwerer intensivpflichtiger Komplikationen vorhanden sein.

Um eine flächendeckende Versorgung in Österreich sicherzustellen, sollten CAR-T-Zellzentren (Zelltherapie-Zentren) etabliert werden, in denen alle vorhin beschriebenen Kompetenzen und nachfolgend dargestellten strukturellen Voraussetzungen erfüllt sein müssen.

Die Vorgaben der Zulassungsbehörde für die derzeit zugelassenen CAR-T-Zelltherapien sind zu beachten. Insbesondere müssen die Qualitätsanforderungen einschließlich der Qualifizierung, die im Rahmen der Zulassung gefordert werden, erfüllt sein.

Alle CAR-T-Zellzentren müssen die unten beschriebenen Struktur-, Personal- und Prozesskriterien erfüllen. Verantwortlich für die Koordination und Durchführung der CAR-T-Zelltherapien sind die ärztliche Leitung und ihre Stellvertretung. Die Therapie mit CAR-T-Zellen erfordert innerhalb der Zentren eine verbindlich geregelte, interdisziplinäre und multiprofessionelle Zusammenarbeit.

1. **Strukturkriterien an CAR-T-Zellzentren**

***1.1 Fachliche Strukturkriterien***

Es müssen umfangreiche Erfahrungen in der Behandlung der jeweiligen malignen Grunderkrankung sowie die Teilnahme an klinischen Studien und Erfahrungen in der Verabreichung experimenteller Therapien vorliegen.

Um umfangreiche Erfahrungen in der Zelltherapie an den Zentren dokumentiert zu haben, müssen allogene und/oder autologe Ersttransplantationen an das Österreichische Stammzelltransplantationsregister (ASCTR)/European Society for Blood and Marrow Transplantation (EBMT)-Register innerhalb der 3 letzten ausgewerteten Jahre gemeldet worden sein.

Jedes CAR-T-Zellzentrum muss umfangreiche Erfahrungen in der intensivmedizinischen Therapie von Patienten mit hämatologischen und onkologischen Erkrankungen haben sowie die erforderliche Ausstattung mit der jederzeitigen Möglichkeit zur Endoskopie, Bronchoskopie, invasiven Beatmung und Nierenersatztherapie. Weiters müssen spezifische SOPs zum Umgang mit Komplikationen der CAR-T-Zelltherapie einschließlich des Einsatzes und der jederzeitigen Verfügbarkeit von Tocilizumab vor Ort entsprechend der Fachinformation vorhanden sein und eine rasche Aufnahme von intensivpflichtigen Patienten auf die Intensivstation verbindlich festgelegt sein.

- 1. ***Weitere Strukturkriterien***
     1. **Hygiene**

Im Rahmen der CAR-T-Zelltherapie wird eine medikamentöse Lymphozytendepletion durchgeführt, die eine Immunsuppression zur Folge hat und auch bei anderen Therapieverfahren bei Patienten mit Lymphomen und akuten Leukämien zum Einsatz gelangen. Nach CAR-T-Zelltherapien können die Patienten eine Neutropenie haben und sind dann entsprechend supportiv zu betreuen wobei auch falls erforderlich eine Unterbringung in einem Isolationszimmer jederzeit gewährleistet sein muss.

Die CAR-T-Zelltherapien sollten in definierten Räumen entsprechend den Vorschriften für das Arbeiten mit genetisch veränderten Mikroorganismen Sicherheitsstufe 1 nach Österreichischem Gentechnikgesetz transfundiert werden.

- - 1. **Apotheke/Gewebebank**

Die zuständige Apotheke/Gewebebank muss in das CAR-T-Zellzentrum durch verbindliche Regelungen zur zeitgerechten Erfüllung der behördlichen Auflagen integriert sein.

- - 1. **Abfälle**

Alle Materialien, die mit dem CAR-T-Zellprodukt in Berührung gekommen sind oder dieses enthalten sind gemäß den lokal geltenden Bestimmungen zur biologischen Sicherheit als potenziell infektiöse Abfallmaterialien zu handhaben und zu beseitigen. Für nicht verwendete CAR-T-Zellen sind die lokalen Bestimmungen zur biologischen Sicherheit entsprechend der Fachinformation des eingesetzten Produktes zu beachten.

- - 1. **Ambulante Betreuung**

Zur ambulanten Nachsorge muss ein Arzt aus dem CAR-T-Zellzentrum jederzeit zur Verfügung stehen. Es muss jederzeit gewährleistet sein, dass die Versorgung in solchen Räumlichkeiten erfolgt, wie sie für die ambulante Versorgung immunsupprimierter Patienten vorgesehen ist. Die räumliche Ausstattung muss es ermöglichen, Patienten mit übertragbaren Infektionen getrennt zu untersuchen und zu behandeln. Für die Therapie mit Infusionen und die Transfusion von Blutprodukten muss eine geeignete Infrastruktur zur Verfügung stehen. Weiters sollte ein Arzt aus dem CAR-T-Zellzentrum jederzeit zur Verfügung stehen, der gemäß der CAR-T-Zellplattform definierten SOPs im Follow-up die Patienten medizinisch betreut und berät. Dies inkludiert auch die Prophylaxe und Therapie von Langzeitnebenwirkungen wie Hypogammaglobulinämie, opportunistische Infektionen und neurologische Toxizität.

- 1. ***Personalkriterien***

Das beteiligte medizinische Personal (Ärzte und Pflege) muss ausreichendes Training und dokumentierte Erfahrung in der Therapie mit zytotoxischen und immunsuppressiven Substanzen sowie kryokonservierten Zellen haben.

Die für die Therapie von Erwachsenen mit CAR-T-Zellen ärztlich verantwortliche Leitung und ihre Stellvertretung müssen Fachärzte für Innere Medizin und Hämatologie und Onkologie sein. Die ärztlich verantwortliche Leitung oder ihre Stellvertretung muss über eine mindestens zweijährige Berufserfahrung in einer Einheit verfügen, in der Patienten mit schwerer Immundefizienz bzw. allogener Stammzelltransplantation behandelt werden.

Bei der Therapie von Kindern und Jugendlichen bis zum Alter von 18 Jahren müssen die für die Behandlungen mit CAR-T-Zellen ärztlich verantwortliche Leitung und ihre Stellvertretung Ärzte für Kinder-und Jugendheilkunde mit dem Schwerpunkt Pädiatrische Hämatologie und Onkologie sein.

Eine ärztliche Betreuung auf Facharztniveau (Innere Medizin, Hämatologie und Onkologie bzw. Kinder-und Jugendheilkunde mit Schwerpunkt Pädiatrische Hämatologie und Onkologie) muss ununterbrochen für die stationäre Betreuung und ambulante Nachsorge der Patienten mit CAR-T-Zelltherapien verfügbar sein, außerhalb der werktägigen Dienstzeiten muss zumindest eine Rufbereitschaft bestehen.

In Anbetracht der zu erwartenden Neurotoxizität der derzeit zugelassenen CAR-T-Zellprodukte ist es von entscheidender Wichtigkeit, dass in Hinblick auf die CAR-T-Zelltherapie geschulte, qualifizierte Fachärzte für Neurologie als Teil des CAR-T-Zellteams sich sofort am interdisziplinären Management der Patienten beteiligen und ständig für die stationäre und ambulante Betreuung der Patienten zur Verfügung stehen.

Bei Verlegung auf die Intensivstation muss sichergestellt sein, dass täglich eine Visite durch einen Facharzt für Innere Medizin, Hämatologie und Onkologie bzw. bei Patienten im Alter bis 17 Jahren durch einen Facharzt für Kinder-und Jugendheilkunde mit Schwerpunkt Pädiatrische Hämatologie und Onkologie auf der Intensivstation durchgeführt wird. Mit ihm ist das Behandlungskonzept auf der Intensivstation abzusprechen.

Zusätzlich müssen folgende Fachdisziplinen ständig verfügbar sein:

Augenheilkunde, HNO-Heilkunde, Kardiologie, Labormedizin, Mikrobiologie (Verfügbarkeit innerhalb von 24 Stunden ausreichend), Neurochirurgie, Psychiatrie, Radiologie (mit CT und MRT), und Urologie.

Für die Pflege sind folgende Qualifikationen erforderlich:

Die Leitung und ihre Vertretung auf der Station für die Versorgung von Patienten mit CAR-T-Zellen sind diplomierte Gesundheits-und Krankenpfleger mit hämato-onkologischer Weiterbildung oder sind mindestens 36 Monate in Vollzeit auf einer Station mit hämatologisch-onkologischem Schwerpunkt tätig gewesen und haben an der zentrumsinternen Schulung für die Therapie von Patienten mit CAR-T-Zellen teilgenommen.

Jede Schicht wird geleitet von einem Gesundheits-und Krankenpfleger, der mindestens 12 Monate in Vollzeit auf einer Station mit hämatologisch-onkologischem Schwerpunkt tätig war, Erfahrungen in der intensiven Chemotherapie von Leukämie-und Lymphompatienten hat und an der zentrumsinternen Schulung für die Therapie von Patienten mit CAR-T-Zellen teilgenommen hat.

Da Patienten auf eine Intensivstation verlegt werden können, muss auch die Pflege der Intensivstation für die Betreuung von Patienten nach CAR-T-Zelltherapie eingeschult werden.

- 1. ***Prozesskriterien***
     1. **Geräte**

Eine Spezifikation und Qualifikation aller Prozesse, Geräte und Materialien zur Entnahme, Kennzeichnung und Lagerung von Ausgangszellen und genetisch veränderten Zellen muss vorhanden sein. Für die Entnahme und Verarbeitung von Leukozyten, welche an Hersteller von CAR-T Zellen abgegeben werden, ist eine Genehmigung der AGES erforderlich. Falls nicht arzneimittelrechtlich zugelassene CAR-T-Zellen eingesetzt werden, muss eine Herstellungserlaubnis vorhanden sein.

- - 1. **SOPs**

Das CAR-T-Zellzentrum muss eine Festlegung, Schulung und Dokumentation der klinischen Standardabläufe sowie die Erfassung und Meldung von unerwünschten Ereignissen haben.

Zu den in SOPs festzulegenden klinischen Standardabläufen gehören insbesondere die klinische, apparative und laborchemische Überwachung zur Früherkennung von CRS und CRES, der Ablauf zur Verlegung des Patienten auf die Intensivstation sowie das Management von CRS und Neurotoxizität jeden Grades.

- - 1. **Qualifizierungsplan**

Vorhandensein und kontinuierliche Revision eines risikobasierten Qualifizierungsplans, der auf der Basis regulatorischer Vorgaben und des aktuellen Wissensstandes alle zentralen Aspekte der Anwendung von CAR-T-Zellen umfasst, sind nachzuweisen.

- - 1. **Qualitätssicherung**

Mitglieder des CAR-T-Zellzentrums sollten an einrichtungsübergreifenden Maßnahmen zur Qualitätssicherung, die von Fachorganisationen, pharmazeutischer Industrie und Aufsichtsbehörden national und international angeboten werden, teilnehmen.

- - 1. **Tumorboard**

Die Vorstellung im Tumorboard erfolgt gemäß den österreichischen Empfehlungen (ÖSG, Onkologiebeirat, etc.) bzw. den lokalen Vorschriften der jeweiligen Krankenanstalt.

- - 1. **Register**

Die Dokumentation ist Bestandteil der Auflagen der EMA an die pharmazeutischen Unternehmer. Die Zentren müssen die personellen und strukturellen Voraussetzungen für den Anschluss an die geplanten Registermodule für CAR-T-Zellen im Österreichischen Stammzelltransplantationsregister oder im Register der EBMT haben und die zeitnahe Dokumentation gewährleisten. Die Finanzierung der Dokumentation der patientenrelevanten Daten und Nebenwirkungen sollte über die Hersteller der CAR-T-Zellprodukte erfolgen.

Literatur

1. June CH et al. CAR T cell immunotherapy for human cancer. Sciene 359:1361-5, 2018.
2. <https://www.ema.europa.eu/medicines/human/EPAR/kymriah>
3. <https://www.ema.europa.eu/medicines/human/EPAR/yescarta>
4. **Indikationskriterien**

In der folgenden Tabelle sind die Indikationen für die klinische Anwendung der derzeit zugelassenen CAR-T-Zellprodukte außerhalb von Studien dargestellt. Weiters sind die Kern-und Selektionskriterien für die Patientenauswahl definiert.

Patienten-Evaluation & Algorithmus für CAR-T-Therapie in den zugelassenen Indikationen außerhalb von Studien

**R/R DLBCL**

**tFL**

**PMBCL**

- Nach Anthrazyklinehältiger Chemotherapie

- Nach CD20 AK Behandlung

- **Rezidiv nach ASZT**

**≥ 2 L Therapie**

- **Therapierefraktärität**

**≥ 2 L Therapie**

**aber**

- **Chemoresponsibel***
- **Allo SZT prüfen!**

**Erweiterte Selektionskriterien** prüfen: **6.-12.**: 7/7 erfüllt

**Kernselektionskriterien** prüfen

5/5 erfüllt

**JA** zu

CAR-T-Therapie

**Kernselektionskriterien**

**prüfen**

**NEIN** zu

CAR-T-Therapie

**Kernselektionskriterien**

5/5 **NICHT** erfüllt

**Therapierefraktärität**

**≥ 3 L oder 4 L Therapie**

CAR-T-Therapie **Diskutieren**

**Kernselektionskriterien** prüfen

5/5 erfüllt

**Erweiterte Selektionskriterien** prüfen: **6.-12.**:

- **6.-12**.: 6/7 partiell erfüllt
- 11.+12.: grenzwertig erniedrigt

* bezieht sich auf die „bridging Chemotherapie“

Abkürzungen: R/R=rezidiviert/refraktär; DLBCL=diffus großzelliges B-Zell-Lymphom; tFL=transformiertes follikuläres Lymphom; PMBCL=peripheres mediastinales B-Zell-Lymphom; ASZT=autologe Blutstammzelltransplantation; L=Linien; allo SZT=allogene Stammzelltransplantation.

| Kern- & Selektionskriterien (13 Punkte) | | | |
| --- | --- | --- | --- |
|  | | | |
|  |  | **ja** | **nein** |
| Kernselektionskriterien |  |  |  |
| 1. Herz EF | > 50% |  |  |
| 1. Lunge SpO2 | > 91-92% bei Raumluft |  |  |
| 1. ECOG PS | 0-1 |  |  |
| 1. ZNS | - Keine aktive/ symptomatische Beteiligung;  - Keine schwerwiegende neurologische Erkrankung, die als KI gewertet wird |  |  |
| 1. Infektion | Keine aktive |  |  |
| SUMME |  |  |  |
| Erweiterte Selektionskriterien | |  |  |
| 1. ANC G/L | ≥ 1.0 |  |  |
| 1. ALC G/L | > 0.1-0.3 |  |  |
| 1. NFP eGFR | ≥ 60 ml/min/1.73 m2 |  |  |
| 1. LFP S-ALT/AST | < 2.5 x ULN |  |  |
| 1. LFP total Bilirubin | < 2.0 mg/dl |  |  |
| 1. PT G/L | ≥ 50-75 |  |  |
| 1. Hb g/dl | > 8.0 |  |  |
| SUMME |  |  |  |

Abkürzungen: ZNS=Zentrales Nervensystem; EF=Ejection Fraktion; KI=Kontraindikation; ANC=Absoluter Neutrophilen Wert; ALC=Absoluter Lymphozyten Wert; NFP=Nierenfunktionsparameter; LFP=Leberfunktionsparameter; PT=Thrombozyten; Hb=Hämoglobin; ULN=oberer Normalwert.
